# Supplementary material for: Potential Role of miRNAs as Theranostic Biomarkers of Epilepsy
Source: PubMed Central journal article supplement — Mol Ther Nucleic Acids. 2018 Sep 13;13:275–90. doi: 10.1016/j.omtn.2018.09.008 (PMC6197620; doi:10.1016/j.omtn.2018.09.008), 2018-09-13
Supplement: mmc1.pdf [file mmc1.pdf]

**OMTN, Volume 13**

**Supplemental Information**

**Potential Role of miRNAs as Theranostic**

**Biomarkers of Epilepsy**

**Claudia Cava, Ida Manna, Antonio Gambardella, Gloria Bertoli, and Isabella Castiglioni**

## Supplementary information

| miRNA              | Gene target                                                                                                                                                                   |
|--------------------|-------------------------------------------------------------------------------------------------------------------------------------------------------------------------------|
| <i>miR-15a-5p</i>  | APP, ATF2, BCL2, CHUK, HSP90B1, IKBKG, and JUN                                                                                                                                |
| <i>miR-106b-5p</i> | ANAPC7, AP1G1, AP2B1, CD34, CDC42, CDKN1A, CLTC, HUWE1, KIF23, PIK3AP1, PSMA3, PTEN, TRIP12, and YES                                                                          |
| <i>miR-146</i>     | CD40LG, CDKN1A, CFH, FADD, ICAM1, IFI27, IFIT1, IFIT3, IFITM1, IFITM3, IRAK1, IRAK2, IRF7, ISG15, ITGB2, KIF22, MX2, OASL, OSBPL1A, RAC1, SIKE1, STAT1, TLR2, TLR4, and TRAF6 |
| <i>miR-451</i>     | AKT1, BCL2, IKBKB, IL6R, and UBE2H                                                                                                                                            |

**Table S1** Summary of genes that are target of epilepsy-associated miRNA in neuroinflammation pathway.

| miRNA              | Gene target                                                                                   |
|--------------------|-----------------------------------------------------------------------------------------------|
| <i>miR-15a-5p</i>  | ACTR1A, BRCA1, BTRC, CCND1, CCND2, CCNE1, CDC25A, CENPJ, CEP63, HIST1H2BK, PRIM1, PSMC4, TP53 |
| <i>miR-34a</i>     | CCND1, CDK6, E2F3, MYC                                                                        |
| <i>miR-106b-5p</i> | ANAPC7, CCND1, CCND2, CDKN1A, E2F1, E2F3, E2F5, RB1, RBL1, RBL2, WEE1                         |
| <i>miR-146</i>     | CCNA2, CDKN1A, SMAD2, SMAD4                                                                   |

**Table S2** Summary of genes that are target of epilepsy-associated miRNA in neurogenesis, cell cycle control and cell proliferation.

| miRNA              | Gene target                                    |
|--------------------|------------------------------------------------|
| <i>miR-15a-5p</i>  | AKT3, BCL2, CHUK, IKBKG, NFKB1, TP53           |
| <i>miR-106b-5p</i> | ACIN1, APC, BCL2L11, CASP7, CASP8, E2F1, PSMA3 |
| <i>miR-146</i>     | FADD, FAS, IRAK1, IRAK2, NFKB1                 |
| <i>miR-451</i>     | AKT1, BCL2, IKBKB                              |

**Table S3** Summary of genes that are target of epilepsy-associated miRNA in apoptosis.
